# Supplementary material for: Detection and characterization at nM concentration of oligomers formed by hIAPP, Aβ(1–40) and their equimolar mixture using SERS and MD simulations
Source: Royal Society of Chemistry journal article supplement (doi:10.1039/c7cp08552d), 2018-01-01
Supplement: c7cp08552d1.pdf [file c7cp08552d1.pdf]

## Detection and characterization at nM concentration of oligomers formed by hIAPP, Ab(1–40) and their equimolar mixture using SERS and MD simulations.

Luisa D'Urso,<sup>a</sup> Marcello Condorelli,<sup>a</sup> Orazio Puglisi,<sup>a</sup> Carmelo Temptra,<sup>a</sup> Fabio Lolicato,<sup>b,c</sup> Giuseppe Compagnini,<sup>a</sup> and Carmelo La Rosa<sup>a,\*</sup>

---

<sup>a</sup> Department of Chemical Sciences, V.le A. Doria 6 -95125 Catania, Italy. Email:clarosa@unict.it

<sup>b</sup>. Department of Physics, University of Helsinki, P.O. Box 64, FI-00014 Helsinki, Finland.

<sup>c</sup> Laboratory of Physics, Tampere University of Technology, P.O. Box 692, FI-33101 Tampere, Finland

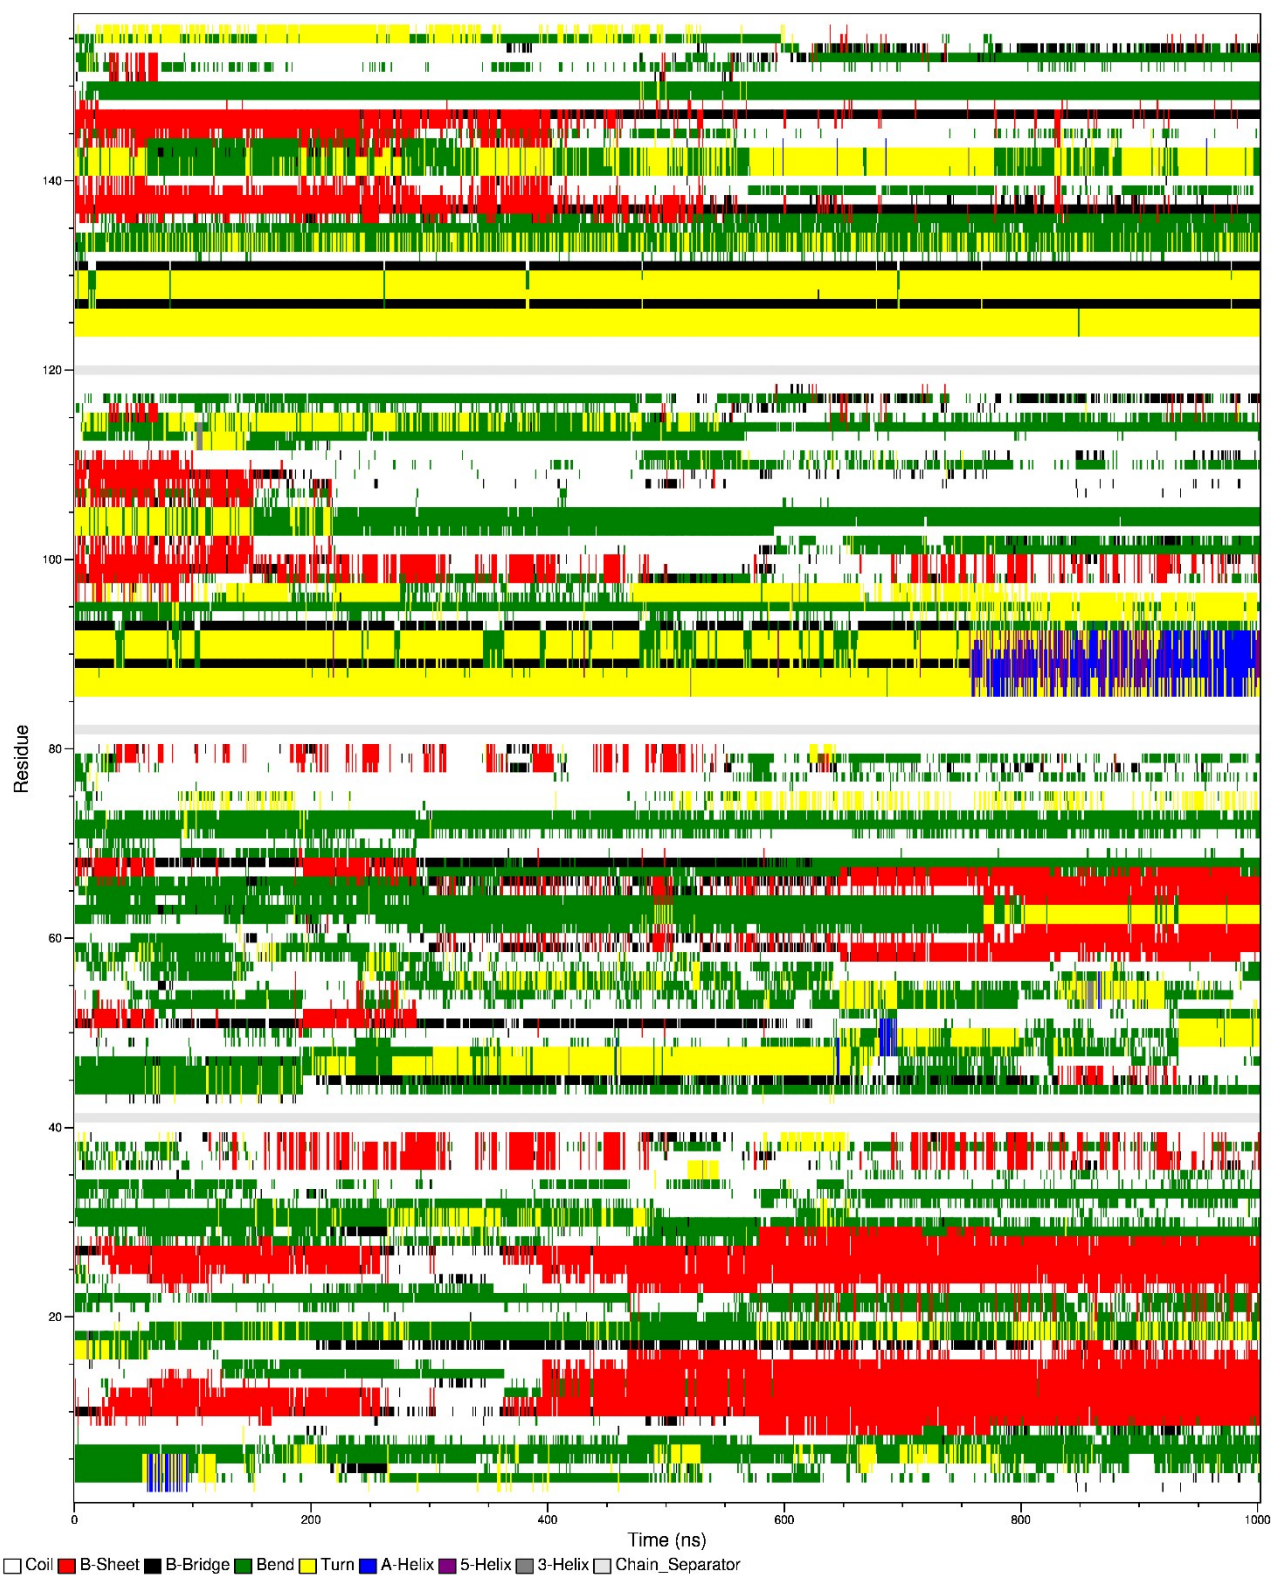

Figure S1. Secondary structures evolution over 1  $\mu$ s of atomistic simulation of first run of A $\beta$  (1-40) and hIAPP tetramer molar ratio 1:1. Residue from 1 to 80 indicate the A $\beta$  (1-40), the residue from 81 to 154 indicate the hIAPP residue.

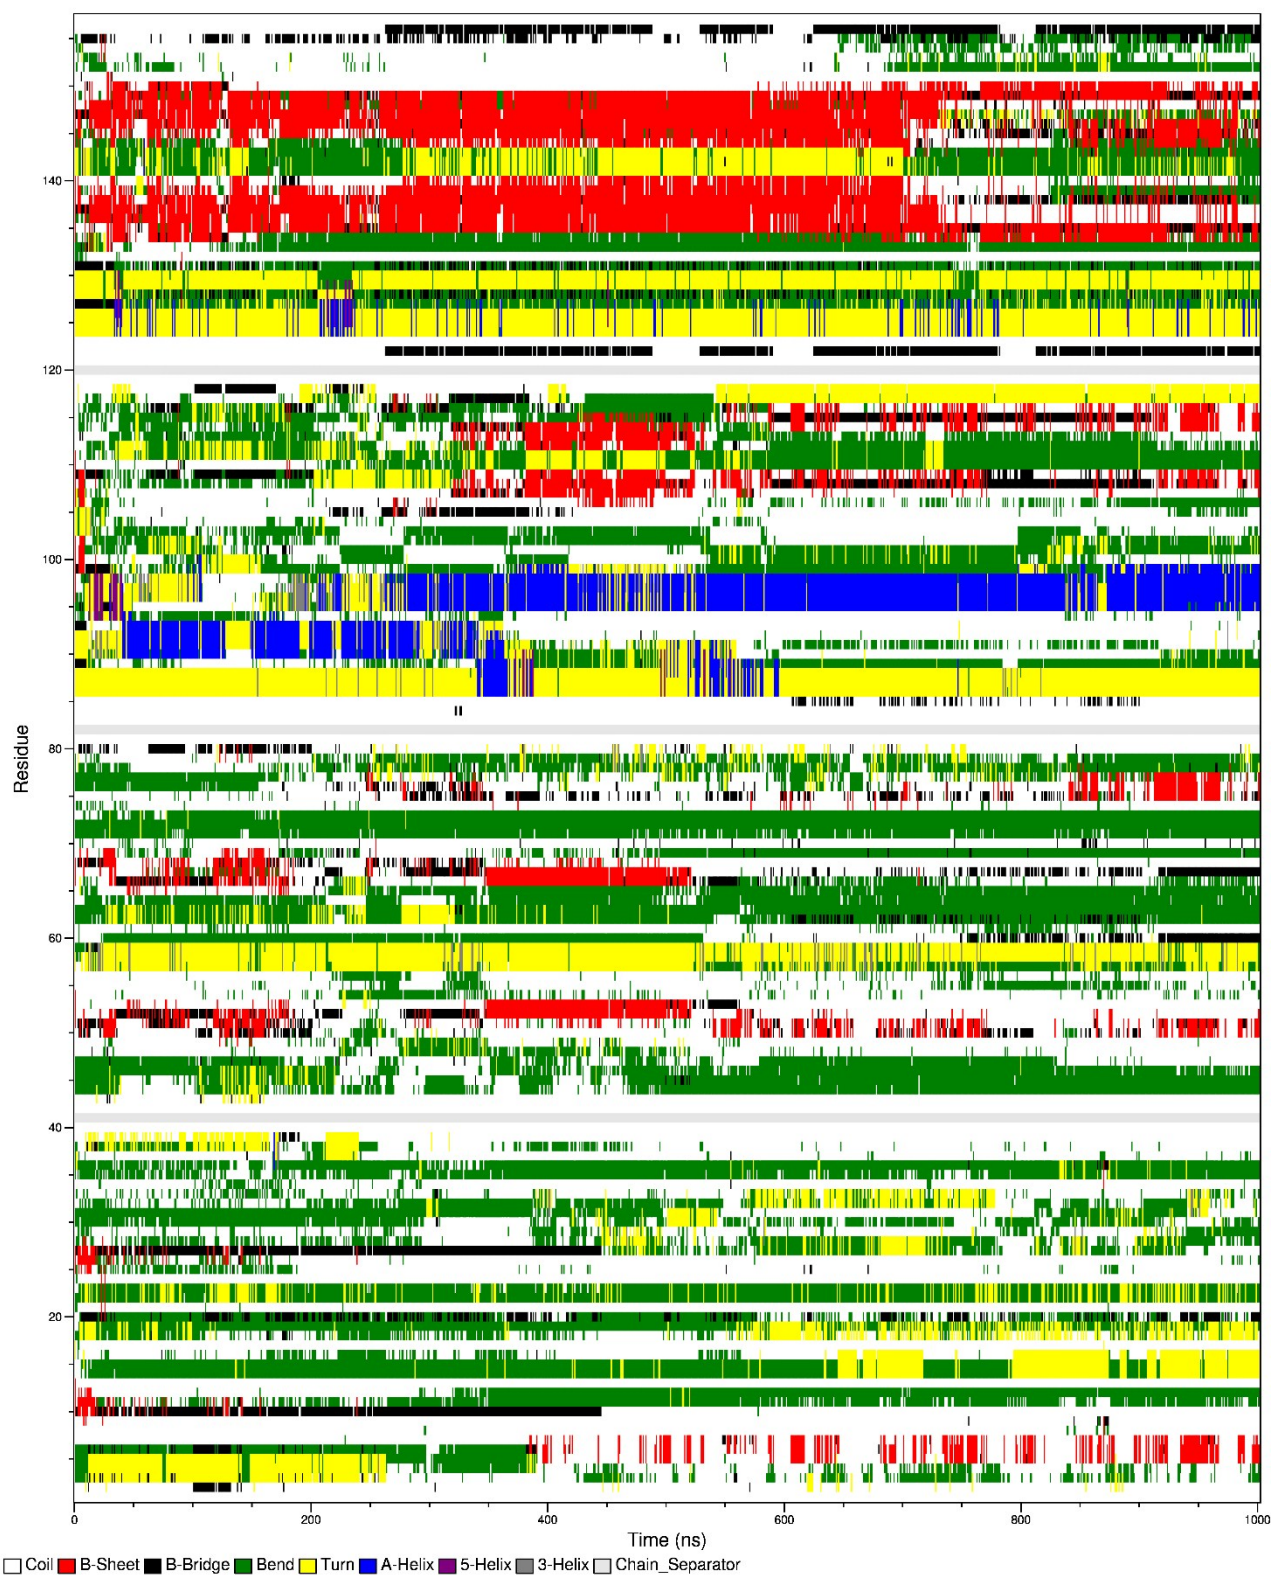

Figure S2. Secondary structures evolution over 1  $\mu$ s of atomistic simulation of second run of A $\beta$  (1-40) and hIAPP tetramer molar ratio 1:1. Residue from 1 to 80 indicate the A $\beta$  (1-40), the residue from 81 to 154 indicate the hIAPP residue.

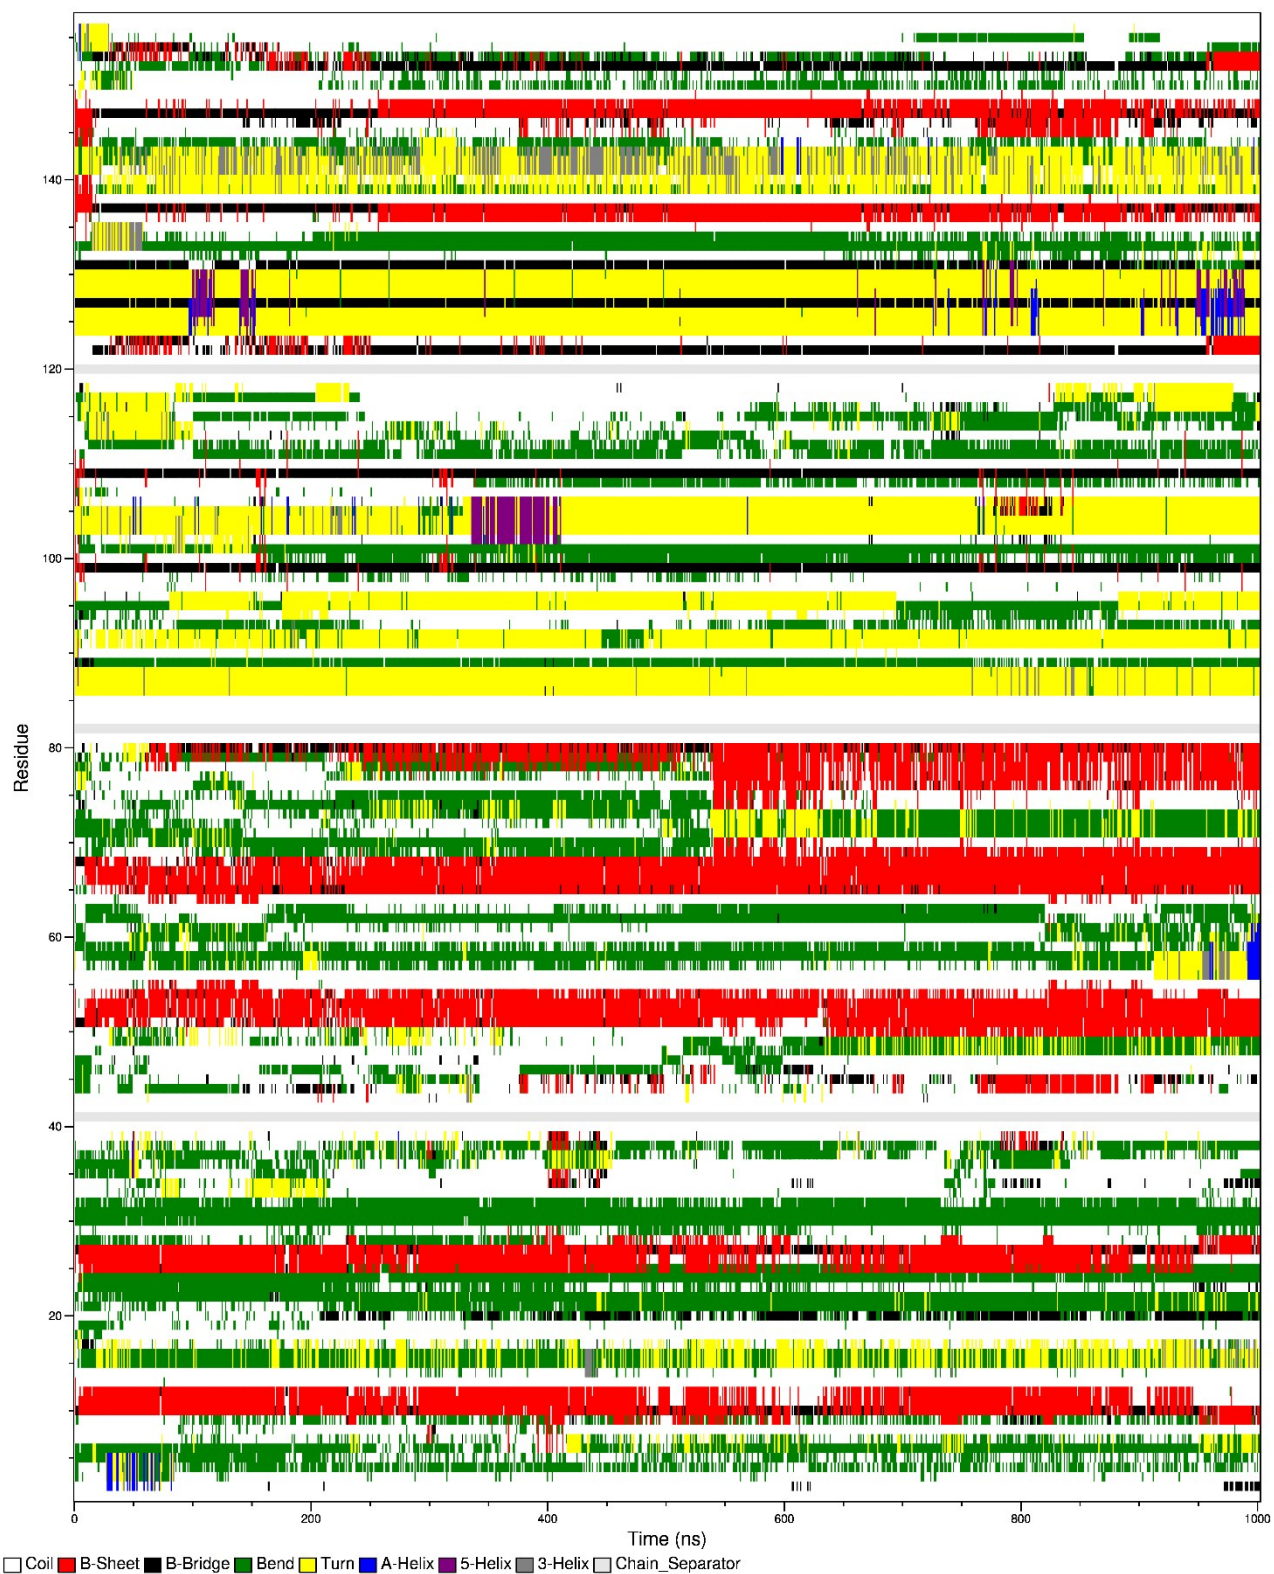

Figure S3. Secondary structures evolution over 1  $\mu$ s of atomistic simulation of third run of A $\beta$  (1-40) and hIAPP tetramer molar ratio 1:1. Residue from 1 to 80 indicate the A $\beta$  (1-40), the residue from 81 to 154 indicate the hIAPP residue.

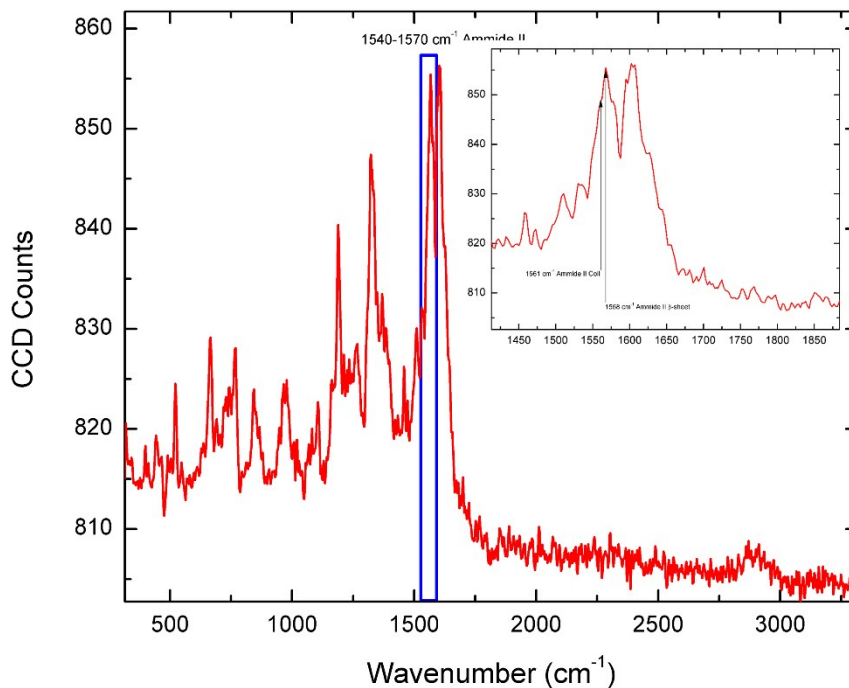

Fig S4. SERS spectra of equimolar mixture of A $\beta$  (1-40) and hIAPP at 10nM concentration. Panel in the right corner is the magnification of the amide II bands. The  $\beta$ -sheet/random coil ratio was calculated from the ratio between the intensity at 1568  $\text{cm}^{-1}$  ( $\beta$ -sheet) and intensity at 1561  $\text{cm}^{-1}$  (random coil).
